# Supplementary material
Source: PubMed Central journal article supplement (PMC8324524)
Supplement: NIHMS1698788-supplement-Supplementary_Material.pdf [file NIHMS1698788-supplement-Supplementary_Material.pdf]

---

**Supplementary information**

---

**Enteric glial biology, intercellular signalling  
and roles in gastrointestinal disease**

---

In the format provided by the  
authors and unedited

**Supplementary Table 1 | Properties of astrocytes versus enteric glia**

| <b>Known homeostatic properties of astrocytes</b>                                                         | <b>Shared homeostatic properties with enteric glia</b>                                                                                                                                                                                                                                                                                                                                                                                                                                                                                                                  |
|-----------------------------------------------------------------------------------------------------------|-------------------------------------------------------------------------------------------------------------------------------------------------------------------------------------------------------------------------------------------------------------------------------------------------------------------------------------------------------------------------------------------------------------------------------------------------------------------------------------------------------------------------------------------------------------------------|
| Ionostasis in the nervous system (K <sup>+</sup> , Cl <sup>-</sup> , Na <sup>+</sup> , Ca <sup>2+</sup> ) | <ul style="list-style-type: none"> <li>• Possible but untested</li> <li>• Expression of potassium channels<sup>1, 2</sup></li> </ul>                                                                                                                                                                                                                                                                                                                                                                                                                                    |
| Regulation of extracellular pH                                                                            | <ul style="list-style-type: none"> <li>• Unknown</li> </ul>                                                                                                                                                                                                                                                                                                                                                                                                                                                                                                             |
| Regulation of water homeostasis                                                                           | <ul style="list-style-type: none"> <li>• Possible but untested</li> <li>• Expression of AQP4<sup>3</sup></li> </ul>                                                                                                                                                                                                                                                                                                                                                                                                                                                     |
| Scavengers of reactive oxygen species                                                                     | <ul style="list-style-type: none"> <li>• Release of reduced glutathione<sup>4, 5</sup></li> </ul>                                                                                                                                                                                                                                                                                                                                                                                                                                                                       |
| Neurotransmitters homeostasis                                                                             | <ul style="list-style-type: none"> <li>• Probable</li> <li>• Uptake and inactivation of neurotransmitters and neuromodulators (glutamine synthetase<sup>6</sup>, GAT2<sup>7</sup>, PEPT2<sup>8</sup>, eNTPDase2<sup>9, 10</sup>)</li> <li>• Removal and detoxification of waste NH<sub>4</sub><sup>+</sup><sup>6, 11</sup></li> <li>• Supply neurotransmitter precursors (L-arginine<sup>12, 13</sup> and glutamine<sup>6</sup>)</li> </ul>                                                                                                                             |
| Neuronal metabolism support                                                                               | <ul style="list-style-type: none"> <li>• Unknown</li> </ul>                                                                                                                                                                                                                                                                                                                                                                                                                                                                                                             |
| Support neurogenesis and neuronal development                                                             | <ul style="list-style-type: none"> <li>• Probable</li> <li>• Release of neurotrophic factors (proEGF, NGF)<sup>14–16</sup></li> <li>• Neuronal differentiation in response to intestinal injury<sup>17–19</sup></li> </ul>                                                                                                                                                                                                                                                                                                                                              |
| Regulation of synaptic homeostasis and neurotransmission                                                  | <ul style="list-style-type: none"> <li>• Probable</li> <li>• Make synaptoid contacts with vesicle-containing nerve varicosities<sup>20</sup></li> <li>• Respond to neuroligands (ATP, UTP, serotonin, histamine, endothelin family members, acetylcholine)<sup>21–24</sup></li> <li>• Expression of neurotransmitter and neuromodulator receptors (P2X7, P2Y2, P2Y4, P2Y1, A2B, mGluR5, α2a, SP1R, LPA1, M3, M5, LPA1)<sup>25–35</sup></li> <li>• Release of gliotransmitters in response to neuronal signaling (ATP, GABA, PGE<sub>2</sub>)<sup>36–38</sup></li> </ul> |
| Regulation of neurovascular unit and local blood flow                                                     | <ul style="list-style-type: none"> <li>• Unknown</li> <li>• Release of vasoactive compounds (NO, PGE<sub>2</sub>, ATP, VEGF)<sup>24, 36, 38–40</sup></li> <li>• Probable interaction with the vasculature (ETB, B2, PAR1, PAR2)<sup>24, 38, 41, 42</sup></li> </ul>                                                                                                                                                                                                                                                                                                     |
| Systemic homeostasis and barrier integrity                                                                | <ul style="list-style-type: none"> <li>• Debated</li> <li>• Influence the maturation, differentiation, adhesion, migration and proliferation of the intestinal epithelium (GSNO, 15d-PGJ2, TGF-β, proEGF, 15-HETE)<sup>14, 43–47</sup></li> </ul>                                                                                                                                                                                                                                                                                                                       |
| Modulate intestinal immune and inflammatory responses                                                     | <ul style="list-style-type: none"> <li>• Probable</li> <li>• Express toll-like receptor 4 (TLR4) and MHC-II in disease states<sup>49, 50</sup></li> <li>• Release pro- and anti-inflammatory cytokines, and chemokines (IL-1β, IL-6, TGF-β)<sup>40, 42, 43, 51</sup></li> </ul>                                                                                                                                                                                                                                                                                         |

|  |                                                                                            |
|--|--------------------------------------------------------------------------------------------|
|  | • Shift to reactive state in response to homeostatic perturbation <sup>46, 49, 52–54</sup> |
|--|--------------------------------------------------------------------------------------------|

## Supplementary References

1. Broussard, D. L., Bannerman, P. G., Tang, C. M., Hardy, M., & Pleasure, D. Electrophysiologic and molecular properties of cultured enteric glia. *J. Neurosci. Res.* **34**, 24–31 (1993).
2. Hanani, M. et al. Patch-clamp study of neurons and glial cells in isolated myenteric ganglia. *Am. J. Physiol. Gastrointest. Liver Physiol.* **278**, G644–G651 (2000)
3. Jiang, L., Li, J., Liu, X., Burnstock, G., & Xiang, Z. Expression of aquaporin-4 water channels in the digestive tract of the guinea pig. *Journal of molecular histology* **45**, 229–241 (2014).
4. Brown, I. A. M. & Gulbransen, B. D. The antioxidant glutathione protects against enteric neuron death in situ, but its depletion is protective during colitis. *Am. J. Physiol. Gastrointest. Liver Physiol.* **314**, G39–G52 (2018).
5. Abdo, H. H. et al. Enteric glial cells protect neurons from oxidative stress in part via reduced glutathione. *FASEB J.* **24**, 1082–1094 (2010).
6. Jessen, K. R. & Mirsky, R. Astrocyte-like glia in the peripheral nervous system: an immunohistochemical study of enteric glia. *J. Neurosci.* **3**, 2206–2218 (1983).
7. Fletcher, E. L., Clark, M. J. & Furness, J. B. Neuronal and glial localization of GABA transporter immunoreactivity in the myenteric plexus. *Cell Tissue Res.* **308**, 339–346 (2002).
8. Ruhl, A., Hoppe, S., Frey, I., Daniel, H. & Schemann, M. Functional expression of the peptide transporter PEPT2 in the mammalian enteric nervous system. *J. Comp. Neurol.* **490**, 1–11 (2005).
9. Grubišić, V. et al. NTPDase1 and -2 are expressed by distinct cellular compartments in the mouse colon and differentially impact colonic physiology and function after DSS colitis. *Am. J. Physiol. Gastrointest. Liver Physiol.* **317**, G314–G332 (2019).
10. Braun, N. et al. Association of the ecto-ATPase NTPDase2 with glial cells of the peripheral nervous system. *Glia* **45**, 124–132 (2004).
11. Fried, D. E., Watson, R. E., Robson, S. C. & Gulbransen, B. D. Ammonia modifies enteric neuromuscular transmission through glial  $\gamma$ -aminobutyric acid signaling. *Am. J. Physiol. Gastrointest. Liver Physiol.* **313**, G570–G580 (2017).
12. Aoki, E., Semba, R. & Kashiwamata, S. Evidence for the presence of L-arginine in the glial components of the peripheral nervous system. *Brain Res.* **559**, 159–162 (1991).
13. Nagahama, M., Semba, R., Tsuzuki, M. & Aoki, E. L-arginine immunoreactive enteric glial cells in the enteric nervous system of rat ileum. *Biol. Signals Recept.* **10**, 336–340 (2001).

14. Van Landeghem, L. *et al.* Enteric glia promote intestinal mucosal healing via activation of focal adhesion kinase and release of proEGF. *Am. J. Physiol. Gastrointest. Liver Physiol.* **300**, G976–G987 (2011).
15. Boyen, von, G. B. T. *et al.* Nerve growth factor secretion in cultured enteric glia cells is modulated by proinflammatory cytokines. *J. Neuroendocrinol.* **18**, 820–825 (2006).
16. Long, X. *et al.* Butyrate promotes visceral hypersensitivity in an IBS-like model via enteric glial cell-derived nerve growth factor. *Neurogastroenterol. Motil.* **30**, e13227 (2018).
17. Laranjeira, C. *et al.* Glial cells in the mouse enteric nervous system can undergo neurogenesis in response to injury. *J. Clin. Invest.* **121**, 3412–3424 (2011).
18. Belkind-Gerson, J. *et al.* Colitis promotes neuronal differentiation of Sox2+ and PLP1+ enteric cells. *Sci. Rep.* **7**, 2525 (2017).
19. Le Berre-Scoul, C. *et al.* A novel enteric neuron-glia coculture system reveals the role of glia in neuronal development. *J. Physiol.* **595**, 583–598 (2017).
20. Gabella G. Ultrastructure of the nerve plexuses of the mammalian intestine: the enteric glial cells. *Neuroscience* **6**, 425–436 (1981).
21. Gulbransen, B. D., Bains, J. S., & Sharkey, K. A. Enteric glia are targets of the sympathetic innervation of the myenteric plexus in the guinea pig distal colon. *J. Neurosci.* **30**, 6801–6809 (2010).
22. Kimball, B. C. & Mulholland, M. W. Enteric glia exhibit P2U receptors that increase cytosolic calcium by a phospholipase C-dependent mechanism. *J. Neurochem.* **66**, 604–612 (1996).
23. Boesmans, W. *et al.* Neurotransmitters involved in fast excitatory neurotransmission directly activate enteric glial cells. *Neurogastroenterol. Motil.* **25**, e151–e160 (2013).
24. Zhang, W., Sarosi, G. A., Jr, Barnhart, D. C., & Mulholland, M. W. Endothelin-stimulated capacitative calcium entry in enteric glial cells: synergistic effects of protein kinase C activity and nitric oxide. *J. Neurochem.* **71**, 205–212 (1998).
25. Delvalle, N. M., Fried, D. E., Rivera-Lopez, G., Gaudette, L. & Gulbransen, B. D. Cholinergic activation of enteric glia is a physiological mechanism that contributes to the regulation of gastrointestinal motility. *Am. J. Physiol. Gastrointest. Liver Physiol.* **315**, G473–G483 (2018).
26. Vergnolle, N., & Cirillo, C. Neurons and Glia in the Enteric Nervous System and Epithelial Barrier Function. *Physiology (Bethesda, Md.)* **33**, 269–280 (2018).
27. McClain, J. L. *et al.* Ca<sup>2+</sup> responses in enteric glia are mediated by connexin-43 hemichannels and modulate colonic transit in mice. *Gastroenterology* **146**, 497–507.e1 (2014).
28. Gulbransen, B. D. & Sharkey, K. A. Purinergic neuron-to-glia signaling in the enteric nervous system. *Gastroenterology* **136**, 1349–1358 (2009).

29. Garrido, R., Segura, B., Zhang, W., & Mulholland, M. Presence of functionally active protease-activated receptors 1 and 2 in myenteric glia. *J. Neurochem.* **83**, 556–564 (2002).
30. Vanderwinden, J. M., Timmermans, J. P., & Schiffmann, S. N. Glial cells, but not interstitial cells, express P2X7, an ionotropic purinergic receptor, in rat gastrointestinal musculature. *Cell Tissue Res.* **312**, 149–154 (2003).
31. Segura, B. J. *et al.* Lysophosphatidic acid stimulates calcium transients in enteric glia. *Neuroscience* **123**, 687–693 (2004).
32. Segura, B. J. *et al.* Sphingosine-1-phosphate mediates calcium signaling in guinea pig enteroglial cells. *J. Surg. Res.* **116**, 42–54 (2004).
33. Vieira, C., Ferreirinha, F., Silva, I., Duarte-Araújo, M., & Correia-de-Sá, P. Localization and function of adenosine receptor subtypes at the longitudinal muscle myenteric plexus of the rat ileum. *Neurochem. Int.* **59**, 1043–1055 (2011).
34. Nasser, Y., Keenan, C. M., Ma, A. C., McCafferty, D. M., & Sharkey, K. A. Expression of a functional metabotropic glutamate receptor 5 on enteric glia is altered in states of inflammation. *Glia* **55**, 859–872 (2007).
35. Nasser, Y., Ho, W., & Sharkey, K. A. Distribution of adrenergic receptors in the enteric nervous system of the guinea pig, mouse, and rat. *J. Comp. Neurol.* **495**, 529–553 (2006).
36. Brown, I. A. M., McClain, J. L., Watson, R. E., Patel, B. A. & Gulbransen, B. D. Enteric glia mediate neuron death in colitis through purinergic pathways that require connexin-43 and nitric oxide. *Cell. Mol. Gastroenterol. Hepatol.* **2**, 77–91 (2016).
37. Fried, D. E., Watson, R. E., Robson, S. C. & Gulbransen, B. D. Ammonia modifies enteric neuromuscular transmission through glial  $\gamma$ -aminobutyric acid signaling. *Am. J. Physiol. Gastrointest. Liver Physiol.* **313**, G570–G580 (2017).
38. Murakami, M., Ohta, T., Otsuguro, K.-I. & Ito, S. Involvement of prostaglandin E2 derived from enteric glial cells in the action of bradykinin in cultured rat myenteric neurons. *Neuroscience* **145**, 642–653 (2007).
39. MacEachern, S. J., Patel, B. A., McKay, D. M., & Sharkey, K. A. Nitric oxide regulation of colonic epithelial ion transport: a novel role for enteric glia in the myenteric plexus. *J. Physiol.* **589**, 3333–3348 (2011).
40. Rosenbaum, C. *et al.* Activation of myenteric glia during acute inflammation in vitro and In vivo. *PLoS ONE* **11**, e0151335 (2016).
41. Garrido, R., Segura, B., Zhang, W., & Mulholland, M. Presence of functionally active protease-activated receptors 1 and 2 in myenteric glia. *J. Neurochem.* **83**, 556–564 (2002).
42. Murakami, M., Ohta, T. & Ito, S. Lipopolysaccharides enhance the action of bradykinin in enteric neurons via secretion of interleukin-1 $\beta$  from enteric glial cells. *J. Neurosci. Res.* **87**, 2095–2104 (2009).

43. Neunlist, M. *et al.* Enteric glia inhibit intestinal epithelial cell proliferation partly through a TGF-beta1-dependent pathway. *Am. J. Physiol. Gastrointest. Liver Physiol.* **292**, G231–G241 (2007).
44. Savidge, T. C. *et al.* Enteric glia regulate intestinal barrier function and inflammation via release of S-nitrosoglutathione. *Gastroenterology* **132**, 1344–1358 (2007).
45. Bach-Ngohou, K. *et al.* Enteric glia modulate epithelial cell proliferation and differentiation through 15-deoxy-12,14-prostaglandin J2. *J. Physiol.* **588**, 2533–2544 (2010).
46. Pochard, C. *et al.* Defects in 15-HETE production and control of epithelial permeability by human enteric glial cells from patients with Crohn's disease. *Gastroenterology* **150**, 168–180 (2016).
47. Van Landeghem, L. *et al.* Regulation of intestinal epithelial cells transcriptome by enteric glial cells: impact on intestinal epithelial barrier functions. *BMC genomics* **10**, 507 (2009).
48. Boesmans, W., Hao, M. M., & Vanden Berghe, P. Optical tools to investigate cellular activity in the intestinal wall. *J. Neurogastroenterol. Motil.* **21**, 337–351 (2015).
49. Esposito, G. *et al.* Palmitoylethanolamide improves colon inflammation through an enteric glia/toll like receptor 4-dependent PPAR- $\alpha$  activation. *Gut* **63**, 1300–1312 (2014).
50. Turco, F. *et al.* Enteroglial-derived S100B protein integrates bacteria-induced Toll-like receptor signalling in human enteric glial cells. *Gut* **63**, 105–115 (2014).
51. Rühl, A., Franzke, S., Collins, S. M., & Stremmel, W. Interleukin-6 expression and regulation in rat enteric glial cells. *Am. J. Physiol. Gastrointest. Liver Physiol.* **280**, G1163–G1171 (2001).
52. Delvalle, N. M. *et al.* Communication between enteric neurons, glia, and nociceptors underlies the effects of tachykinins on neuroinflammation. *Cell. Mol. Gastroenterol. Hepatol.* **6**, 321–344 (2018).
53. Brown, I. A. M., McClain, J. L., Watson, R. E., Patel, B. A. & Gulbransen, B. D. Enteric glia mediate neuron death in colitis through purinergic pathways that require connexin-43 and nitric oxide. *Cell. Mol. Gastroenterol. Hepatol.* **2**, 77–91 (2016).
54. Cornet, A. *et al.* Enterocolitis induced by autoimmune targeting of enteric glial cells: a possible mechanism in Crohn's disease? *Proc. Natl Acad. Sci.* **98**, 13306–13311 (2001).
